# Supplementary material for: Evaluation of the ASSIGN open-source deterministic address-matching algorithm for allocating unique property reference numbers to general practitioner-recorded patient addresses
Source: PubMed Central journal article supplement — Int J Popul Data Sci. 2021 Dec 8;6(1):1674. doi: 10.23889/ijpds.v6i1.1674 (PMC8678979; doi:10.23889/ijpds.v6i1.1674), 2021-12-08

## Supplementary Appendix 1: GUILD report on ASSIGN: The checklist uses data linkage reporting principals from the GUILD Guidance for Information about Linking Data Sets

| <b>Data provision</b>                                                                 |                                                                                                                                                                                                                                                                                                                                                                                                                                                                                                                                                                                                                                                                                                                                                                                                                                                                                                                                                                                                                                                                                                                                                                           |                                                                                                                                                                                                                                                                                                                                                                                                                                                                                                                                                                                                                                                                                                                                                                                                                                                                   |
|---------------------------------------------------------------------------------------|---------------------------------------------------------------------------------------------------------------------------------------------------------------------------------------------------------------------------------------------------------------------------------------------------------------------------------------------------------------------------------------------------------------------------------------------------------------------------------------------------------------------------------------------------------------------------------------------------------------------------------------------------------------------------------------------------------------------------------------------------------------------------------------------------------------------------------------------------------------------------------------------------------------------------------------------------------------------------------------------------------------------------------------------------------------------------------------------------------------------------------------------------------------------------|-------------------------------------------------------------------------------------------------------------------------------------------------------------------------------------------------------------------------------------------------------------------------------------------------------------------------------------------------------------------------------------------------------------------------------------------------------------------------------------------------------------------------------------------------------------------------------------------------------------------------------------------------------------------------------------------------------------------------------------------------------------------------------------------------------------------------------------------------------------------|
| <b>Concept</b>                                                                        | <b>Discovery data service (DDS) patient addresses</b>                                                                                                                                                                                                                                                                                                                                                                                                                                                                                                                                                                                                                                                                                                                                                                                                                                                                                                                                                                                                                                                                                                                     | <b>AddressBase Premium</b>                                                                                                                                                                                                                                                                                                                                                                                                                                                                                                                                                                                                                                                                                                                                                                                                                                        |
| Population included                                                                   | <p>Distinct current GP registered patient addresses as at 16<sup>th</sup> November 2020 from 7 CCG GP practices in north east London for persons aged 18 and over.</p> <p>n = 945,196 distinct addresses</p> <p>Reporting on distinct addresses so that the number of patients with the same address does not skew results.</p>                                                                                                                                                                                                                                                                                                                                                                                                                                                                                                                                                                                                                                                                                                                                                                                                                                           | <p>Records for Greater London area plus 8km buffer Epoch 75.</p> <p>n = 10,595,513 (local authority Land and Property Identifier LPI and Royal Mail Delivery Point Address DPA records)</p>                                                                                                                                                                                                                                                                                                                                                                                                                                                                                                                                                                                                                                                                       |
| Linkability: how generated                                                            | Addresses provided by patients either online or on a paper form when registering with GPs                                                                                                                                                                                                                                                                                                                                                                                                                                                                                                                                                                                                                                                                                                                                                                                                                                                                                                                                                                                                                                                                                 | Master list of addresses sourced from Ordnance Survey, Royal Mail and local authorities                                                                                                                                                                                                                                                                                                                                                                                                                                                                                                                                                                                                                                                                                                                                                                           |
| Linkability: how processed                                                            | Entered manually by GP practice administrators                                                                                                                                                                                                                                                                                                                                                                                                                                                                                                                                                                                                                                                                                                                                                                                                                                                                                                                                                                                                                                                                                                                            | Managed and maintained by GeoPlace <sup>2</sup>                                                                                                                                                                                                                                                                                                                                                                                                                                                                                                                                                                                                                                                                                                                                                                                                                   |
| Linkability: how quality controlled                                                   | Varies by practice: either no quality control, or check against a street list, or Google searches                                                                                                                                                                                                                                                                                                                                                                                                                                                                                                                                                                                                                                                                                                                                                                                                                                                                                                                                                                                                                                                                         | GeoPlace stringent data quality processes. Run 359 checks on each record before being accepted into the database. BS7666 <sup>3</sup> standard.                                                                                                                                                                                                                                                                                                                                                                                                                                                                                                                                                                                                                                                                                                                   |
| Linkability: updates                                                                  | When informed by patient. Updated addresses are available to Discovery Data Service in real-time                                                                                                                                                                                                                                                                                                                                                                                                                                                                                                                                                                                                                                                                                                                                                                                                                                                                                                                                                                                                                                                                          | Every 6 weeks                                                                                                                                                                                                                                                                                                                                                                                                                                                                                                                                                                                                                                                                                                                                                                                                                                                     |
| Linkability: cleaning and validation                                                  | <p>Address data quality measures calculated. The addresses are reformatted:</p> <ul style="list-style-type: none"> <li>• into eleven standard address object fields: flat, building, number, dependent thoroughfare, street, dependent locality, locality, town, postcode, organisation, vertical</li> <li>• a second version of the eleven standard address object field is created by correcting spelling errors, de-pluralisation, replacing or removing punctuation and lower casing, and removing extraneous words that are unnecessary in the match process, for example, the range of words that are equivalent to the word 'flat' such as 'apartment' or 'maisonette'</li> <li>• positional checking is carried out e.g. the abbreviation 'st' would be mapped to "street" as a spelling correction, but not if it was presented as the first word in a field "St David's" for example would be retained as "St David".</li> </ul> <p>See <a href="https://github.com/endeavourhealth-discovery/uprn-match/tree/master/UPRN/yottadb">https://github.com/endeavourhealth-discovery/uprn-match/tree/master/UPRN/yottadb</a> for address preformatting routines.</p> | <p>The addresses are reformatted:</p> <ul style="list-style-type: none"> <li>• into eleven standard address object fields: flat, building, number, dependent thoroughfare, street, dependent locality, locality, town, postcode, organisation, vertical</li> <li>• the eleven standard address object fields are indexed with single and compound indexes to improve search performance time</li> <li>• the eleven standard address object fields are indexed with performance improving indexes based on semantic equivalence or semantic performance including correcting spelling errors, de-pluralisation, replacing or removing punctuation and lower casing, and removing extraneous words that are unnecessary in the match process, for example, the range of words that are equivalent to the word 'flat' such as 'apartment' or 'maisonette'</li> </ul> |
| Linkability: replaced with artificial identifiers to reduce disclosure before linkage | N/A                                                                                                                                                                                                                                                                                                                                                                                                                                                                                                                                                                                                                                                                                                                                                                                                                                                                                                                                                                                                                                                                                                                                                                       | N/A                                                                                                                                                                                                                                                                                                                                                                                                                                                                                                                                                                                                                                                                                                                                                                                                                                                               |

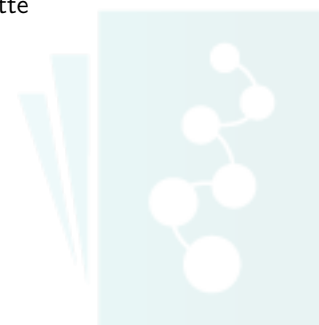

## Supplementary Appendix 1: Continued

| <b>Data linkage</b>                              |                                                                                                                                                                                                                                                                                                                                                                                                                                                                                                                                                                                                                                                                                                                                                                                                                                                                                                                                                                                                                                                                                                                                                                                                                                                                                                                                                                                                                                                                                                                                                                                                                                                                                                                                                                                                                                                                                                                                                                                                                                                                                       |                                                                                                                                      |
|--------------------------------------------------|---------------------------------------------------------------------------------------------------------------------------------------------------------------------------------------------------------------------------------------------------------------------------------------------------------------------------------------------------------------------------------------------------------------------------------------------------------------------------------------------------------------------------------------------------------------------------------------------------------------------------------------------------------------------------------------------------------------------------------------------------------------------------------------------------------------------------------------------------------------------------------------------------------------------------------------------------------------------------------------------------------------------------------------------------------------------------------------------------------------------------------------------------------------------------------------------------------------------------------------------------------------------------------------------------------------------------------------------------------------------------------------------------------------------------------------------------------------------------------------------------------------------------------------------------------------------------------------------------------------------------------------------------------------------------------------------------------------------------------------------------------------------------------------------------------------------------------------------------------------------------------------------------------------------------------------------------------------------------------------------------------------------------------------------------------------------------------------|--------------------------------------------------------------------------------------------------------------------------------------|
| <b>Concept</b>                                   | <b>DDS patient addresses</b>                                                                                                                                                                                                                                                                                                                                                                                                                                                                                                                                                                                                                                                                                                                                                                                                                                                                                                                                                                                                                                                                                                                                                                                                                                                                                                                                                                                                                                                                                                                                                                                                                                                                                                                                                                                                                                                                                                                                                                                                                                                          | <b>AddressBase premium</b>                                                                                                           |
| Process: characteristics used for linkage        | Address and postcode                                                                                                                                                                                                                                                                                                                                                                                                                                                                                                                                                                                                                                                                                                                                                                                                                                                                                                                                                                                                                                                                                                                                                                                                                                                                                                                                                                                                                                                                                                                                                                                                                                                                                                                                                                                                                                                                                                                                                                                                                                                                  | Address and postcode                                                                                                                 |
| Process: patterns of missingness                 | <p>There are 945,196 total <i>distinct</i> addresses of which 804 (0.09%) have a missing or invalid address or postcode<sup>1</sup>.</p> <p><sup>1</sup>An incomplete address &lt;8 characters in length; or contains no alphanumeric characters; or contains the words: unknown, no fixed abode, dummy, nfa, not found, not entitled, overseas, not known, not given, overseas, patient, visitor, unk, address, zz99, @, place of birth, none; or begins with: a special character, london, xx, or x; or does not follow full UK postcode format</p>                                                                                                                                                                                                                                                                                                                                                                                                                                                                                                                                                                                                                                                                                                                                                                                                                                                                                                                                                                                                                                                                                                                                                                                                                                                                                                                                                                                                                                                                                                                                 | N/A                                                                                                                                  |
| Process: expected range of values after cleaning | N/A                                                                                                                                                                                                                                                                                                                                                                                                                                                                                                                                                                                                                                                                                                                                                                                                                                                                                                                                                                                                                                                                                                                                                                                                                                                                                                                                                                                                                                                                                                                                                                                                                                                                                                                                                                                                                                                                                                                                                                                                                                                                                   | N/A                                                                                                                                  |
| Process: de-duplication                          | Duplicate address strings relating to different patient-address pairs removed in previous step. Duplicate addresses that are formatted differently were included because they could not easily be identified as relating to the same address until UPRNs are assigned.                                                                                                                                                                                                                                                                                                                                                                                                                                                                                                                                                                                                                                                                                                                                                                                                                                                                                                                                                                                                                                                                                                                                                                                                                                                                                                                                                                                                                                                                                                                                                                                                                                                                                                                                                                                                                | N/A<br>Duplicate versions of UPRN in ABP due to different versions of the same address reflecting aliases and the address life cycle |
| Process: description of algorithm                | <p><b>Reformat</b><br/>Candidate and standard addresses are reformatted as per 'cleaning and validation' section.</p> <p><b>Match</b><br/>Blocking by matching postcode area, potential matching standard addresses are assessed deterministically by applying matching judgement rules in rank order of extent of string manipulation (rank 1 = no manipulation), using a decision tree to determine which string comparison match tests are passed and which fail until all branches are exhausted and the best match is found. These rules mirror human pattern recognition and are coded using e.g. Levenshtein distance<sup>4</sup>, pattern matching (Regex), field swapping and pluralisation. A match is made with one of four overall qualifiers that qualifies the relationship between the candidate address and the matched standard address in relation to approximate geography, or no match is made. The four qualifiers are:</p> <ul style="list-style-type: none"> <li>• Best match: the closest match out of all available</li> <li>• Child: candidate address is a 'child' sub-property of the UPRN it has been matched to</li> <li>• Parent: candidate address is the 'parent' building shell of the UPRN it has been matched to</li> <li>• Sibling: candidate address is a near neighbour of the UPRN it has been matched to</li> </ul> <p><b>Return</b><br/>Where there is a match, the algorithm returns the UPRN, the overall qualifier, the standard address, the match pattern and match rule identifier employed to get that match. The match rule is a label identifying which section of the code made the match, and the match pattern depicts how five address objects were manipulated to achieve the match. These five address objects are merged from the original eleven: flat, building, number, street, postcode. Twelve possible match terms (see Table 1) exist and can be combined in up to 50 different ways on the five address fields. These are restricted to plausible terms, for example, postcodes are never swapped with streets.</p> |                                                                                                                                      |

Continued.

## Supplementary Appendix 1: Continued

| Data linkage                                                                            |                                                                                                                                                                                                                                                                                                                                                                                                                                                                                                                                                                                                                                                                                                                                                                                                                                                                                                                                                                                                                                                                                                                                                                                                                                                                                                                                                                                                                                                                                                                                                                                                                                                                                                                                                                                                                                                                                                                                                                                                                                                                                                                                                                                                                           |                     |           |       |   |            |         |       |       |       |      |        |     |      |         |       |      |               |         |  |                |       |        |          |       |           |           |         |           |  |  |  |              |      |      |      |              |     |     |     |              |      |      |     |              |      |      |      |                  |     |     |     |                                         |      |      |      |                                            |      |      |      |                                         |     |     |     |                               |     |     |     |
|-----------------------------------------------------------------------------------------|---------------------------------------------------------------------------------------------------------------------------------------------------------------------------------------------------------------------------------------------------------------------------------------------------------------------------------------------------------------------------------------------------------------------------------------------------------------------------------------------------------------------------------------------------------------------------------------------------------------------------------------------------------------------------------------------------------------------------------------------------------------------------------------------------------------------------------------------------------------------------------------------------------------------------------------------------------------------------------------------------------------------------------------------------------------------------------------------------------------------------------------------------------------------------------------------------------------------------------------------------------------------------------------------------------------------------------------------------------------------------------------------------------------------------------------------------------------------------------------------------------------------------------------------------------------------------------------------------------------------------------------------------------------------------------------------------------------------------------------------------------------------------------------------------------------------------------------------------------------------------------------------------------------------------------------------------------------------------------------------------------------------------------------------------------------------------------------------------------------------------------------------------------------------------------------------------------------------------|---------------------|-----------|-------|---|------------|---------|-------|-------|-------|------|--------|-----|------|---------|-------|------|---------------|---------|--|----------------|-------|--------|----------|-------|-----------|-----------|---------|-----------|--|--|--|--------------|------|------|------|--------------|-----|-----|-----|--------------|------|------|-----|--------------|------|------|------|------------------|-----|-----|-----|-----------------------------------------|------|------|------|--------------------------------------------|------|------|------|-----------------------------------------|-----|-----|-----|-------------------------------|-----|-----|-----|
| Concept                                                                                 | DDS patient addresses                                                                                                                                                                                                                                                                                                                                                                                                                                                                                                                                                                                                                                                                                                                                                                                                                                                                                                                                                                                                                                                                                                                                                                                                                                                                                                                                                                                                                                                                                                                                                                                                                                                                                                                                                                                                                                                                                                                                                                                                                                                                                                                                                                                                     | AddressBase Premium |           |       |   |            |         |       |       |       |      |        |     |      |         |       |      |               |         |  |                |       |        |          |       |           |           |         |           |  |  |  |              |      |      |      |              |     |     |     |              |      |      |     |              |      |      |      |                  |     |     |     |                                         |      |      |      |                                            |      |      |      |                                         |     |     |     |                               |     |     |     |
| Process: new derived linkage variables                                                  | <p>An example of a match pattern is 'Pe,Se,Ne,Bp,Fe'. This means that the postcode, street, number, and flat fields were equivalent matches between the candidate and standard address, and the building field was a partial match between the candidate and standard address. The algorithm is described here: <a href="https://wiki.discoverydataservice.org/index.php?title=UPRN_address_matching_algorithm">https://wiki.discoverydataservice.org/index.php?title=UPRN_address_matching_algorithm</a></p> <p>The algorithm is available for free open-source use here: <a href="https://github.com/endeavourhealth-discovery/ASSIGN">https://github.com/endeavourhealth-discovery/ASSIGN</a></p>                                                                                                                                                                                                                                                                                                                                                                                                                                                                                                                                                                                                                                                                                                                                                                                                                                                                                                                                                                                                                                                                                                                                                                                                                                                                                                                                                                                                                                                                                                                      |                     |           |       |   |            |         |       |       |       |      |        |     |      |         |       |      |               |         |  |                |       |        |          |       |           |           |         |           |  |  |  |              |      |      |      |              |     |     |     |              |      |      |     |              |      |      |      |                  |     |     |     |                                         |      |      |      |                                            |      |      |      |                                         |     |     |     |                               |     |     |     |
| Process: blocking methods                                                               | By postcode area                                                                                                                                                                                                                                                                                                                                                                                                                                                                                                                                                                                                                                                                                                                                                                                                                                                                                                                                                                                                                                                                                                                                                                                                                                                                                                                                                                                                                                                                                                                                                                                                                                                                                                                                                                                                                                                                                                                                                                                                                                                                                                                                                                                                          |                     |           |       |   |            |         |       |       |       |      |        |     |      |         |       |      |               |         |  |                |       |        |          |       |           |           |         |           |  |  |  |              |      |      |      |              |     |     |     |              |      |      |     |              |      |      |      |                  |     |     |     |                                         |      |      |      |                                            |      |      |      |                                         |     |     |     |                               |     |     |     |
| Record-level indicators of the process                                                  | UPRN, qualifier, match rule, match pattern                                                                                                                                                                                                                                                                                                                                                                                                                                                                                                                                                                                                                                                                                                                                                                                                                                                                                                                                                                                                                                                                                                                                                                                                                                                                                                                                                                                                                                                                                                                                                                                                                                                                                                                                                                                                                                                                                                                                                                                                                                                                                                                                                                                |                     |           |       |   |            |         |       |       |       |      |        |     |      |         |       |      |               |         |  |                |       |        |          |       |           |           |         |           |  |  |  |              |      |      |      |              |     |     |     |              |      |      |     |              |      |      |      |                  |     |     |     |                                         |      |      |      |                                            |      |      |      |                                         |     |     |     |                               |     |     |     |
| Aggregate linkage results: number of records linked and unlinked                        | <p>Of 945,196 distinct address strings:</p> <p>924,094 matched (<b>98%</b>)</p> <p>21,102 unmatched (<b>2%</b>)</p>                                                                                                                                                                                                                                                                                                                                                                                                                                                                                                                                                                                                                                                                                                                                                                                                                                                                                                                                                                                                                                                                                                                                                                                                                                                                                                                                                                                                                                                                                                                                                                                                                                                                                                                                                                                                                                                                                                                                                                                                                                                                                                       | N/A                 |           |       |   |            |         |       |       |       |      |        |     |      |         |       |      |               |         |  |                |       |        |          |       |           |           |         |           |  |  |  |              |      |      |      |              |     |     |     |              |      |      |     |              |      |      |      |                  |     |     |     |                                         |      |      |      |                                            |      |      |      |                                         |     |     |     |                               |     |     |     |
| Aggregate linkage results: comparison of characteristics of linked and unlinked records | <p>Of 924,094 matched, broken down by qualifier:</p> <table border="1" data-bbox="427 931 903 1133"> <thead> <tr> <th>Qualifier</th> <th>Count</th> <th>%</th> </tr> </thead> <tbody> <tr> <td>Best match</td> <td>904,259</td> <td>97.85</td> </tr> <tr> <td>Child</td> <td>9,912</td> <td>1.07</td> </tr> <tr> <td>Parent</td> <td>686</td> <td>0.07</td> </tr> <tr> <td>Sibling</td> <td>9,237</td> <td>1.00</td> </tr> <tr> <td>Total matched</td> <td>924,094</td> <td></td> </tr> </tbody> </table> <p>Address characteristics:</p> <table border="1" data-bbox="427 1171 1477 1570"> <thead> <tr> <th>Characteristic</th> <th>Total</th> <th>Linked</th> <th>Unlinked</th> </tr> </thead> <tbody> <tr> <td>Total</td> <td>1,549,669</td> <td>1,425,497</td> <td>124,172</td> </tr> <tr> <td>Of which:</td> <td></td> <td></td> <td></td> </tr> <tr> <td>E postcode %</td> <td>61.2</td> <td>61.2</td> <td>62.0</td> </tr> <tr> <td>N postcode %</td> <td>7.3</td> <td>7.3</td> <td>9.0</td> </tr> <tr> <td>R postcode %</td> <td>18.7</td> <td>19.0</td> <td>6.0</td> </tr> <tr> <td>I postcode %</td> <td>12.3</td> <td>12.3</td> <td>11.8</td> </tr> <tr> <td>Other postcode %</td> <td>0.5</td> <td>0.3</td> <td>8.6</td> </tr> <tr> <td>Address begins with numeric character %</td> <td>75.9</td> <td>76.5</td> <td>52.7</td> </tr> <tr> <td>Address begins with alphabetic character %</td> <td>24.0</td> <td>23.5</td> <td>46.6</td> </tr> <tr> <td>Address begins with special character %</td> <td>0.0</td> <td>0.0</td> <td>0.7</td> </tr> <tr> <td>Invalid address or postcode %</td> <td>0.1</td> <td>0.0</td> <td>3.5</td> </tr> </tbody> </table> <p>There are higher proportions of 'Other' postcodes, addresses beginning with an alphabetic character (i.e. a flat rather than a house) or a special character, and invalid addresses or postcodes in unmatched compared to matched. Differences between matched and unmatched addresses across all characteristics were found to be significant using chi square tests, but this could be attributable to the large sample size. Patient and registration characteristics are compared in section 'Population characteristics' of the paper.</p> |                     | Qualifier | Count | % | Best match | 904,259 | 97.85 | Child | 9,912 | 1.07 | Parent | 686 | 0.07 | Sibling | 9,237 | 1.00 | Total matched | 924,094 |  | Characteristic | Total | Linked | Unlinked | Total | 1,549,669 | 1,425,497 | 124,172 | Of which: |  |  |  | E postcode % | 61.2 | 61.2 | 62.0 | N postcode % | 7.3 | 7.3 | 9.0 | R postcode % | 18.7 | 19.0 | 6.0 | I postcode % | 12.3 | 12.3 | 11.8 | Other postcode % | 0.5 | 0.3 | 8.6 | Address begins with numeric character % | 75.9 | 76.5 | 52.7 | Address begins with alphabetic character % | 24.0 | 23.5 | 46.6 | Address begins with special character % | 0.0 | 0.0 | 0.7 | Invalid address or postcode % | 0.1 | 0.0 | 3.5 |
| Qualifier                                                                               | Count                                                                                                                                                                                                                                                                                                                                                                                                                                                                                                                                                                                                                                                                                                                                                                                                                                                                                                                                                                                                                                                                                                                                                                                                                                                                                                                                                                                                                                                                                                                                                                                                                                                                                                                                                                                                                                                                                                                                                                                                                                                                                                                                                                                                                     | %                   |           |       |   |            |         |       |       |       |      |        |     |      |         |       |      |               |         |  |                |       |        |          |       |           |           |         |           |  |  |  |              |      |      |      |              |     |     |     |              |      |      |     |              |      |      |      |                  |     |     |     |                                         |      |      |      |                                            |      |      |      |                                         |     |     |     |                               |     |     |     |
| Best match                                                                              | 904,259                                                                                                                                                                                                                                                                                                                                                                                                                                                                                                                                                                                                                                                                                                                                                                                                                                                                                                                                                                                                                                                                                                                                                                                                                                                                                                                                                                                                                                                                                                                                                                                                                                                                                                                                                                                                                                                                                                                                                                                                                                                                                                                                                                                                                   | 97.85               |           |       |   |            |         |       |       |       |      |        |     |      |         |       |      |               |         |  |                |       |        |          |       |           |           |         |           |  |  |  |              |      |      |      |              |     |     |     |              |      |      |     |              |      |      |      |                  |     |     |     |                                         |      |      |      |                                            |      |      |      |                                         |     |     |     |                               |     |     |     |
| Child                                                                                   | 9,912                                                                                                                                                                                                                                                                                                                                                                                                                                                                                                                                                                                                                                                                                                                                                                                                                                                                                                                                                                                                                                                                                                                                                                                                                                                                                                                                                                                                                                                                                                                                                                                                                                                                                                                                                                                                                                                                                                                                                                                                                                                                                                                                                                                                                     | 1.07                |           |       |   |            |         |       |       |       |      |        |     |      |         |       |      |               |         |  |                |       |        |          |       |           |           |         |           |  |  |  |              |      |      |      |              |     |     |     |              |      |      |     |              |      |      |      |                  |     |     |     |                                         |      |      |      |                                            |      |      |      |                                         |     |     |     |                               |     |     |     |
| Parent                                                                                  | 686                                                                                                                                                                                                                                                                                                                                                                                                                                                                                                                                                                                                                                                                                                                                                                                                                                                                                                                                                                                                                                                                                                                                                                                                                                                                                                                                                                                                                                                                                                                                                                                                                                                                                                                                                                                                                                                                                                                                                                                                                                                                                                                                                                                                                       | 0.07                |           |       |   |            |         |       |       |       |      |        |     |      |         |       |      |               |         |  |                |       |        |          |       |           |           |         |           |  |  |  |              |      |      |      |              |     |     |     |              |      |      |     |              |      |      |      |                  |     |     |     |                                         |      |      |      |                                            |      |      |      |                                         |     |     |     |                               |     |     |     |
| Sibling                                                                                 | 9,237                                                                                                                                                                                                                                                                                                                                                                                                                                                                                                                                                                                                                                                                                                                                                                                                                                                                                                                                                                                                                                                                                                                                                                                                                                                                                                                                                                                                                                                                                                                                                                                                                                                                                                                                                                                                                                                                                                                                                                                                                                                                                                                                                                                                                     | 1.00                |           |       |   |            |         |       |       |       |      |        |     |      |         |       |      |               |         |  |                |       |        |          |       |           |           |         |           |  |  |  |              |      |      |      |              |     |     |     |              |      |      |     |              |      |      |      |                  |     |     |     |                                         |      |      |      |                                            |      |      |      |                                         |     |     |     |                               |     |     |     |
| Total matched                                                                           | 924,094                                                                                                                                                                                                                                                                                                                                                                                                                                                                                                                                                                                                                                                                                                                                                                                                                                                                                                                                                                                                                                                                                                                                                                                                                                                                                                                                                                                                                                                                                                                                                                                                                                                                                                                                                                                                                                                                                                                                                                                                                                                                                                                                                                                                                   |                     |           |       |   |            |         |       |       |       |      |        |     |      |         |       |      |               |         |  |                |       |        |          |       |           |           |         |           |  |  |  |              |      |      |      |              |     |     |     |              |      |      |     |              |      |      |      |                  |     |     |     |                                         |      |      |      |                                            |      |      |      |                                         |     |     |     |                               |     |     |     |
| Characteristic                                                                          | Total                                                                                                                                                                                                                                                                                                                                                                                                                                                                                                                                                                                                                                                                                                                                                                                                                                                                                                                                                                                                                                                                                                                                                                                                                                                                                                                                                                                                                                                                                                                                                                                                                                                                                                                                                                                                                                                                                                                                                                                                                                                                                                                                                                                                                     | Linked              | Unlinked  |       |   |            |         |       |       |       |      |        |     |      |         |       |      |               |         |  |                |       |        |          |       |           |           |         |           |  |  |  |              |      |      |      |              |     |     |     |              |      |      |     |              |      |      |      |                  |     |     |     |                                         |      |      |      |                                            |      |      |      |                                         |     |     |     |                               |     |     |     |
| Total                                                                                   | 1,549,669                                                                                                                                                                                                                                                                                                                                                                                                                                                                                                                                                                                                                                                                                                                                                                                                                                                                                                                                                                                                                                                                                                                                                                                                                                                                                                                                                                                                                                                                                                                                                                                                                                                                                                                                                                                                                                                                                                                                                                                                                                                                                                                                                                                                                 | 1,425,497           | 124,172   |       |   |            |         |       |       |       |      |        |     |      |         |       |      |               |         |  |                |       |        |          |       |           |           |         |           |  |  |  |              |      |      |      |              |     |     |     |              |      |      |     |              |      |      |      |                  |     |     |     |                                         |      |      |      |                                            |      |      |      |                                         |     |     |     |                               |     |     |     |
| Of which:                                                                               |                                                                                                                                                                                                                                                                                                                                                                                                                                                                                                                                                                                                                                                                                                                                                                                                                                                                                                                                                                                                                                                                                                                                                                                                                                                                                                                                                                                                                                                                                                                                                                                                                                                                                                                                                                                                                                                                                                                                                                                                                                                                                                                                                                                                                           |                     |           |       |   |            |         |       |       |       |      |        |     |      |         |       |      |               |         |  |                |       |        |          |       |           |           |         |           |  |  |  |              |      |      |      |              |     |     |     |              |      |      |     |              |      |      |      |                  |     |     |     |                                         |      |      |      |                                            |      |      |      |                                         |     |     |     |                               |     |     |     |
| E postcode %                                                                            | 61.2                                                                                                                                                                                                                                                                                                                                                                                                                                                                                                                                                                                                                                                                                                                                                                                                                                                                                                                                                                                                                                                                                                                                                                                                                                                                                                                                                                                                                                                                                                                                                                                                                                                                                                                                                                                                                                                                                                                                                                                                                                                                                                                                                                                                                      | 61.2                | 62.0      |       |   |            |         |       |       |       |      |        |     |      |         |       |      |               |         |  |                |       |        |          |       |           |           |         |           |  |  |  |              |      |      |      |              |     |     |     |              |      |      |     |              |      |      |      |                  |     |     |     |                                         |      |      |      |                                            |      |      |      |                                         |     |     |     |                               |     |     |     |
| N postcode %                                                                            | 7.3                                                                                                                                                                                                                                                                                                                                                                                                                                                                                                                                                                                                                                                                                                                                                                                                                                                                                                                                                                                                                                                                                                                                                                                                                                                                                                                                                                                                                                                                                                                                                                                                                                                                                                                                                                                                                                                                                                                                                                                                                                                                                                                                                                                                                       | 7.3                 | 9.0       |       |   |            |         |       |       |       |      |        |     |      |         |       |      |               |         |  |                |       |        |          |       |           |           |         |           |  |  |  |              |      |      |      |              |     |     |     |              |      |      |     |              |      |      |      |                  |     |     |     |                                         |      |      |      |                                            |      |      |      |                                         |     |     |     |                               |     |     |     |
| R postcode %                                                                            | 18.7                                                                                                                                                                                                                                                                                                                                                                                                                                                                                                                                                                                                                                                                                                                                                                                                                                                                                                                                                                                                                                                                                                                                                                                                                                                                                                                                                                                                                                                                                                                                                                                                                                                                                                                                                                                                                                                                                                                                                                                                                                                                                                                                                                                                                      | 19.0                | 6.0       |       |   |            |         |       |       |       |      |        |     |      |         |       |      |               |         |  |                |       |        |          |       |           |           |         |           |  |  |  |              |      |      |      |              |     |     |     |              |      |      |     |              |      |      |      |                  |     |     |     |                                         |      |      |      |                                            |      |      |      |                                         |     |     |     |                               |     |     |     |
| I postcode %                                                                            | 12.3                                                                                                                                                                                                                                                                                                                                                                                                                                                                                                                                                                                                                                                                                                                                                                                                                                                                                                                                                                                                                                                                                                                                                                                                                                                                                                                                                                                                                                                                                                                                                                                                                                                                                                                                                                                                                                                                                                                                                                                                                                                                                                                                                                                                                      | 12.3                | 11.8      |       |   |            |         |       |       |       |      |        |     |      |         |       |      |               |         |  |                |       |        |          |       |           |           |         |           |  |  |  |              |      |      |      |              |     |     |     |              |      |      |     |              |      |      |      |                  |     |     |     |                                         |      |      |      |                                            |      |      |      |                                         |     |     |     |                               |     |     |     |
| Other postcode %                                                                        | 0.5                                                                                                                                                                                                                                                                                                                                                                                                                                                                                                                                                                                                                                                                                                                                                                                                                                                                                                                                                                                                                                                                                                                                                                                                                                                                                                                                                                                                                                                                                                                                                                                                                                                                                                                                                                                                                                                                                                                                                                                                                                                                                                                                                                                                                       | 0.3                 | 8.6       |       |   |            |         |       |       |       |      |        |     |      |         |       |      |               |         |  |                |       |        |          |       |           |           |         |           |  |  |  |              |      |      |      |              |     |     |     |              |      |      |     |              |      |      |      |                  |     |     |     |                                         |      |      |      |                                            |      |      |      |                                         |     |     |     |                               |     |     |     |
| Address begins with numeric character %                                                 | 75.9                                                                                                                                                                                                                                                                                                                                                                                                                                                                                                                                                                                                                                                                                                                                                                                                                                                                                                                                                                                                                                                                                                                                                                                                                                                                                                                                                                                                                                                                                                                                                                                                                                                                                                                                                                                                                                                                                                                                                                                                                                                                                                                                                                                                                      | 76.5                | 52.7      |       |   |            |         |       |       |       |      |        |     |      |         |       |      |               |         |  |                |       |        |          |       |           |           |         |           |  |  |  |              |      |      |      |              |     |     |     |              |      |      |     |              |      |      |      |                  |     |     |     |                                         |      |      |      |                                            |      |      |      |                                         |     |     |     |                               |     |     |     |
| Address begins with alphabetic character %                                              | 24.0                                                                                                                                                                                                                                                                                                                                                                                                                                                                                                                                                                                                                                                                                                                                                                                                                                                                                                                                                                                                                                                                                                                                                                                                                                                                                                                                                                                                                                                                                                                                                                                                                                                                                                                                                                                                                                                                                                                                                                                                                                                                                                                                                                                                                      | 23.5                | 46.6      |       |   |            |         |       |       |       |      |        |     |      |         |       |      |               |         |  |                |       |        |          |       |           |           |         |           |  |  |  |              |      |      |      |              |     |     |     |              |      |      |     |              |      |      |      |                  |     |     |     |                                         |      |      |      |                                            |      |      |      |                                         |     |     |     |                               |     |     |     |
| Address begins with special character %                                                 | 0.0                                                                                                                                                                                                                                                                                                                                                                                                                                                                                                                                                                                                                                                                                                                                                                                                                                                                                                                                                                                                                                                                                                                                                                                                                                                                                                                                                                                                                                                                                                                                                                                                                                                                                                                                                                                                                                                                                                                                                                                                                                                                                                                                                                                                                       | 0.0                 | 0.7       |       |   |            |         |       |       |       |      |        |     |      |         |       |      |               |         |  |                |       |        |          |       |           |           |         |           |  |  |  |              |      |      |      |              |     |     |     |              |      |      |     |              |      |      |      |                  |     |     |     |                                         |      |      |      |                                            |      |      |      |                                         |     |     |     |                               |     |     |     |
| Invalid address or postcode %                                                           | 0.1                                                                                                                                                                                                                                                                                                                                                                                                                                                                                                                                                                                                                                                                                                                                                                                                                                                                                                                                                                                                                                                                                                                                                                                                                                                                                                                                                                                                                                                                                                                                                                                                                                                                                                                                                                                                                                                                                                                                                                                                                                                                                                                                                                                                                       | 0.0                 | 3.5       |       |   |            |         |       |       |       |      |        |     |      |         |       |      |               |         |  |                |       |        |          |       |           |           |         |           |  |  |  |              |      |      |      |              |     |     |     |              |      |      |     |              |      |      |      |                  |     |     |     |                                         |      |      |      |                                            |      |      |      |                                         |     |     |     |                               |     |     |     |
| Aggregate linkage results: representativeness of the linked data set                    | See paper section 'Bias in UPRN match success'                                                                                                                                                                                                                                                                                                                                                                                                                                                                                                                                                                                                                                                                                                                                                                                                                                                                                                                                                                                                                                                                                                                                                                                                                                                                                                                                                                                                                                                                                                                                                                                                                                                                                                                                                                                                                                                                                                                                                                                                                                                                                                                                                                            |                     |           |       |   |            |         |       |       |       |      |        |     |      |         |       |      |               |         |  |                |       |        |          |       |           |           |         |           |  |  |  |              |      |      |      |              |     |     |     |              |      |      |     |              |      |      |      |                  |     |     |     |                                         |      |      |      |                                            |      |      |      |                                         |     |     |     |                               |     |     |     |
| Aggregate linkage results: flow diagram of linkage steps                                | N/A – the linkage steps pathway is different for different addresses depending on the content and required manipulation of the address string                                                                                                                                                                                                                                                                                                                                                                                                                                                                                                                                                                                                                                                                                                                                                                                                                                                                                                                                                                                                                                                                                                                                                                                                                                                                                                                                                                                                                                                                                                                                                                                                                                                                                                                                                                                                                                                                                                                                                                                                                                                                             |                     |           |       |   |            |         |       |       |       |      |        |     |      |         |       |      |               |         |  |                |       |        |          |       |           |           |         |           |  |  |  |              |      |      |      |              |     |     |     |              |      |      |     |              |      |      |      |                  |     |     |     |                                         |      |      |      |                                            |      |      |      |                                         |     |     |     |                               |     |     |     |

Continued.

Supplementary Appendix 1: Continued

**Data linkage**

| Concept                                          | DDS patient addresses                                                                                                                                                                                                                                                                                                                                                                                                                                                                                                                                                                                                                                                                                                                                            | AddressBase premium                                                  |         |                                                              |                                                                      |             |       |       |     |       |       |           |       |       |
|--------------------------------------------------|------------------------------------------------------------------------------------------------------------------------------------------------------------------------------------------------------------------------------------------------------------------------------------------------------------------------------------------------------------------------------------------------------------------------------------------------------------------------------------------------------------------------------------------------------------------------------------------------------------------------------------------------------------------------------------------------------------------------------------------------------------------|----------------------------------------------------------------------|---------|--------------------------------------------------------------|----------------------------------------------------------------------|-------------|-------|-------|-----|-------|-------|-----------|-------|-------|
| Linkage accuracy: how error rates were estimated | Algorithm applied to two ‘gold-standard’ external reference data sets.<br>1) 9,177 Welsh local authority addresses.<br>2) 9,475 Tower Hamlets local authority addresses<br><br>True false positive matches, false matches, missed matches, and true negative matches are quantified to calculate: <ul style="list-style-type: none"> <li>• Positive Predictive Value (PPV) or Precision - the proportion of record pairs classified by the algorithm as links that are true matches</li> <li>• Sensitivity or Recall– the proportion of true matches that are correctly classified as links.</li> <li>• The F-measure – The harmonic mean between positive predictive value and sensitivity. Often used to compare the overall efficiency of a method</li> </ul> |                                                                      |         |                                                              |                                                                      |             |       |       |     |       |       |           |       |       |
| Linkage accuracy: estimates of error rates       | <table border="1"> <thead> <tr> <th>Measure</th> <th>DDS address linkage results on Welsh gold-standard addresses</th> <th>DDS address linkage results on Tower Hamlets gold-standard addresses</th> </tr> </thead> <tbody> <tr> <td>Sensitivity</td> <td>0.999</td> <td>0.999</td> </tr> <tr> <td>PPV</td> <td>0.996</td> <td>0.998</td> </tr> <tr> <td>F-measure</td> <td>0.997</td> <td>0.998</td> </tr> </tbody> </table>                                                                                                                                                                                                                                                                                                                                    |                                                                      | Measure | DDS address linkage results on Welsh gold-standard addresses | DDS address linkage results on Tower Hamlets gold-standard addresses | Sensitivity | 0.999 | 0.999 | PPV | 0.996 | 0.998 | F-measure | 0.997 | 0.998 |
| Measure                                          | DDS address linkage results on Welsh gold-standard addresses                                                                                                                                                                                                                                                                                                                                                                                                                                                                                                                                                                                                                                                                                                     | DDS address linkage results on Tower Hamlets gold-standard addresses |         |                                                              |                                                                      |             |       |       |     |       |       |           |       |       |
| Sensitivity                                      | 0.999                                                                                                                                                                                                                                                                                                                                                                                                                                                                                                                                                                                                                                                                                                                                                            | 0.999                                                                |         |                                                              |                                                                      |             |       |       |     |       |       |           |       |       |
| PPV                                              | 0.996                                                                                                                                                                                                                                                                                                                                                                                                                                                                                                                                                                                                                                                                                                                                                            | 0.998                                                                |         |                                                              |                                                                      |             |       |       |     |       |       |           |       |       |
| F-measure                                        | 0.997                                                                                                                                                                                                                                                                                                                                                                                                                                                                                                                                                                                                                                                                                                                                                            | 0.998                                                                |         |                                                              |                                                                      |             |       |       |     |       |       |           |       |       |
| Disclosure controls                              | Addresses and UPRNs remain in the identifiable zone of Discovery Data Service only.<br>UPRNs are pseudonymised into Residential Anonymous Linking Fields for third party use                                                                                                                                                                                                                                                                                                                                                                                                                                                                                                                                                                                     |                                                                      |         |                                                              |                                                                      |             |       |       |     |       |       |           |       |       |

<sup>1</sup>Gilbert, R., Lafferty, R., Hagger-Johnson, G., Harron, K., Zhang, L.C., Smith, P., Dibben, C. and Goldstein, H., 2017. GUILD: GUIDance for Information about Linking Data sets. *Journal of Public Health*, 2017 Mar 28:1–8.

<sup>2</sup>[www.geoplace.co.uk](http://www.geoplace.co.uk)

<sup>3</sup><https://www.aligned-assets.co.uk/british-standard-bs7666/>

<sup>4</sup>[https://en.wikipedia.org/wiki/Levenshtein\\_distance](https://en.wikipedia.org/wiki/Levenshtein_distance)

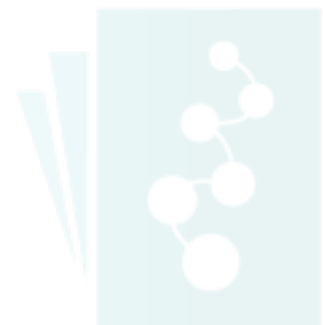

Supplementary Appendix 2: Summary characteristics of the study population according to whether patient address was matched or not matched to a UPRN by the ASSIGN algorithm

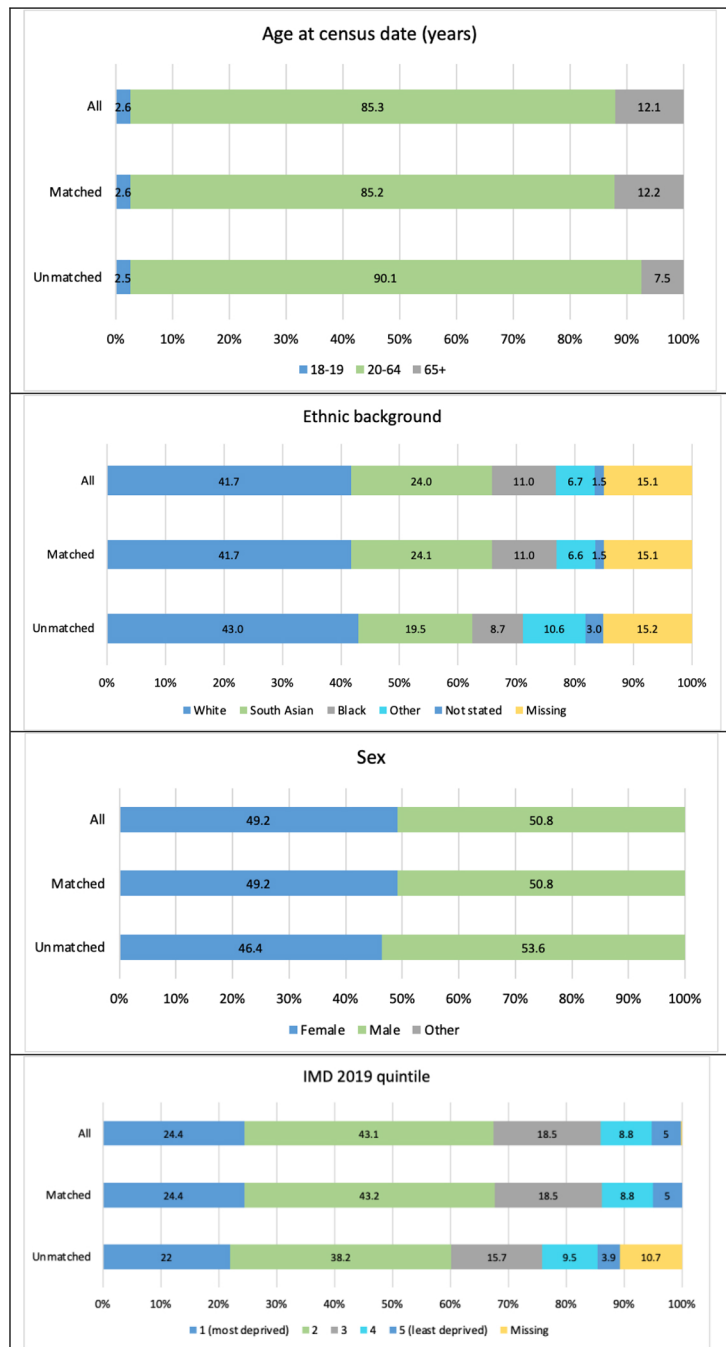

UPRN = Unique Property Reference Number.  
 IMD = Index of Multiple Deprivation.



Supplementary Appendix 3: UPRN match rates and absolute differences in proportion matched with respect to reference category for all explanatory variables N = 1,757,018

|                                              | Number<br><i>n</i> | Address-matched<br>to UPRN<br>(%) | Absolute difference<br>relative to<br>reference group<br>(%) |
|----------------------------------------------|--------------------|-----------------------------------|--------------------------------------------------------------|
| <b>Age at census date 16/11/2020 (years)</b> |                    |                                   |                                                              |
| Missing                                      | 8,116              | 99.62                             | 0.06                                                         |
| <b>&gt;1</b>                                 | <b>50,740</b>      | <b>99.56</b>                      | <b>Ref</b>                                                   |
| 1–14                                         | 133,371            | 99.33                             | –0.22                                                        |
| 15–29                                        | 570,251            | 98.06                             | –1.49                                                        |
| 30–64                                        | 929,452            | 98.71                             | –0.85                                                        |
| 65–84                                        | 59,973             | 98.77                             | –0.85                                                        |
| 85 and over                                  | <b>5,115</b>       | <b>96.72</b>                      | <b>–2.84</b>                                                 |
| <b>Ethnic background</b>                     |                    |                                   |                                                              |
| Missing                                      | 265,524            | 98.56                             | –0.08                                                        |
| <b>British</b>                               | <b>382,170</b>     | <b>98.64</b>                      | <b>Ref</b>                                                   |
| African                                      | 100,743            | 98.68                             | 0.03                                                         |
| Any other Asian background                   | 61,521             | 98.38                             | –0.27                                                        |
| Any other Black background                   | 44,131             | 99.01                             | 0.37                                                         |
| Any other White background                   | 337,905            | 98.4                              | –0.24                                                        |
| Any other ethnic group                       | 52,823             | 98.42                             | –0.22                                                        |
| Any other mixed background                   | 15,018             | 97.88                             | –0.77                                                        |
| Bangladeshi                                  | 145,920            | 99.28                             | 0.64                                                         |
| Caribbean                                    | 48,203             | 99.16                             | 0.51                                                         |
| Chinese                                      | <b>21,961</b>      | <b>95.51</b>                      | <b>–3.14</b>                                                 |
| Indian                                       | 121,134            | 98.51                             | –0.13                                                        |
| Irish                                        | 13,113             | 98.41                             | –0.24                                                        |
| Not stated                                   | <b>26,196</b>      | <b>97.09</b>                      | <b>–1.56</b>                                                 |
| Pakistani                                    | 93,538             | 98.9                              | 0.25                                                         |
| White and Asian                              | 4,947              | 98.08                             | –0.56                                                        |
| White and Black African                      | 9,971              | 97.9                              | –0.74                                                        |
| White and Black Caribbean                    | 12,200             | 98.21                             | –0.43                                                        |
| <b>Sex</b>                                   |                    |                                   |                                                              |
| <b>Female</b>                                | <b>864,337</b>     | <b>98.65</b>                      | <b>Ref</b>                                                   |
| Male                                         | 892,638            | 98.49                             | –0.16                                                        |
| Other                                        | 43                 | 95.35                             | –3.3                                                         |
| <b>IMD 2019 quintile</b>                     |                    |                                   |                                                              |
| Missing                                      | <b>3,502</b>       | <b>23.5</b>                       | <b>–75.21</b>                                                |
| <b>1 (most deprived)</b>                     | <b>428,373</b>     | <b>98.71</b>                      | <b>Ref</b>                                                   |
| 2                                            | 757,212            | 98.74                             | 0.02                                                         |
| 3                                            | 325,075            | 98.79                             | 0.08                                                         |
| 4                                            | 154,523            | 98.45                             | –0.26                                                        |
| 5 (least deprived)                           | 88,333             | 98.88                             | 0.17                                                         |
| <b>GP registration duration (quartiles)</b>  |                    |                                   |                                                              |
| Missing                                      | <b>8,116</b>       | <b>99.58</b>                      | <b>1.94</b>                                                  |
| <b>1 (shortest)</b>                          | <b>437,228</b>     | <b>97.64</b>                      | <b>Ref</b>                                                   |
| 2                                            | 437,422            | 98.36                             | 0.72                                                         |
| 3                                            | <b>437,603</b>     | <b>98.92</b>                      | <b>1.28</b>                                                  |
| 4 (longest)                                  | <b>436,649</b>     | <b>99.36</b>                      | <b>1.72</b>                                                  |

Continued.

## Supplementary Appendix 3: Continued

|                                                          | Number<br><i>n</i> | Address-matched<br>to UPRN<br>(%) | Absolute difference<br>relative to<br>reference group<br>(%) |
|----------------------------------------------------------|--------------------|-----------------------------------|--------------------------------------------------------------|
| <b>Number of GP registrations in preceding 12 months</b> |                    |                                   |                                                              |
| 1                                                        | <b>1,595,729</b>   | <b>98.58</b>                      | <b>Ref</b>                                                   |
| 2                                                        | 144,755            | 98.61                             | 0.03                                                         |
| 3 or more                                                | 16,534             | 97.67                             | -0.91                                                        |
| <b>Number of address changes in preceding 12 months</b>  |                    |                                   |                                                              |
| 1                                                        | <b>1,316,956</b>   | <b>98.98</b>                      | <b>Ref</b>                                                   |
| 2                                                        | <b>343,808</b>     | <b>97.89</b>                      | <b>-1.09</b>                                                 |
| 3 or more                                                | <b>96,254</b>      | <b>95.41</b>                      | <b>-3.57</b>                                                 |
| <b>GP system</b>                                         |                    |                                   |                                                              |
| Missing                                                  | 4,960              | 99.62                             | 0.83                                                         |
| <b>EMIS</b>                                              | <b>1,629,199</b>   | <b>98.79</b>                      | <b>Ref</b>                                                   |
| SystemOne                                                | <b>87,783</b>      | <b>94.39</b>                      | <b>-4.4</b>                                                  |
| Vision                                                   | 35,076             | 98.86                             | 0.08                                                         |
| <b>Clinical Commissioning Group</b>                      |                    |                                   |                                                              |
| <b>Newham</b>                                            | <b>326,386</b>     | <b>99.16</b>                      | <b>Ref</b>                                                   |
| Barking & Dagenham                                       | 168,008            | 98.59                             | -0.57                                                        |
| City & Hackney                                           | 259,973            | 98.25                             | -0.91                                                        |
| Havering                                                 | 221,328            | 99.38                             | 0.22                                                         |
| Redbridge                                                | 251,128            | 98.61                             | -0.55                                                        |
| Tower Hamlets                                            | <b>278,520</b>     | <b>97.7</b>                       | <b>-1.46</b>                                                 |
| Waltham Forest                                           | 251,675            | 98.35                             | -0.81                                                        |

Quartile definitions for GP registration duration: Quartile 1 (shortest): 0–32 months; Quartile 2: 33–77 months; Quartile 3: 78–183 months; Quartile 4 (longest) > 184 months.

EMIS: Egton Medical Information Systems.

Reference groups and values with an absolute match rate difference to the reference group of >1% are in bold.

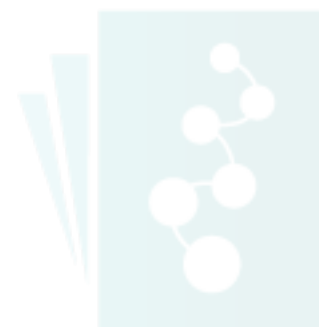

Supplement: ijpds-06-1674-s001.pdf [file ijpds-06-1674-s001.pdf]
